# Supplementary material for: PKMζ-PKCι/λ double-knockout demonstrates atypical PKC is crucial for the persistence of hippocampal LTP and spatial memory
Source: eLife. 2026 Jul 22;15:RP110499. doi: 10.7554/eLife.110499 (PMC13391083; doi:10.7554/eLife.110499)
Supplement: Source data 1. [file elife-110499-data1.xlsx]

## Sheet: Fig1A
PKMζ			PKCι
NTC	ζ-cKO		NTC	ζ-cKO
116.404	8.70933		123.223	166.298
83.5962	5.69059		76.7771	194.073
99.2946	21.2081		102.628	141.443
102.122	13.6996		97.3718	145.867
96.6489	5.38302			156.33
101.934	13.429
104.665	13.9068
85.6158	12.7054
109.719	*61.499
	*outlier

## Sheet: Fig1B
PKCα			PKCβI			PKCβII			PKCγ			PKCδ			PKCε			PKCη			PKCθ
NTC	ζ-cKO		NTC	ζ-cKO		NTC	ζ-cKO		NTC	ζ-cKO		NTC	ζ-cKO		NTC	ζ-cKO		NTC	ζ-cKO		NTC	ζ-cKO
126.584	154.78		116.166	180.089		122.469	154.904		120.242	189.261		74.2389	67.3291		91.7679	106.604		100.798	117.706		112.648	65.1339
73.4157	217.777		83.8343	149.126		77.5312	146.01		79.7575	202.919		132.274	76.753		108.232	123.86		99.2017	116.074		94.155	56.0834
109.509	131.887		121.969	104.509		48.9701	166.346		105.799	184.572		127.428	106.71		133.285	123.815		188.16	117.376		93.1971	64.3686
90.4912	171.879		78.0313	153.037		150.157	167.66		94.2009	200.079		66.059	116.104		87.9232	79.0782		100.523	131.76		112.736	119.008
92.2846	111.112		101.796	140.934		118.111	177.766		114.777	165.125		115.259	137.233		84.862	79.7464		58.1309	84.5162		122.007	168.703
81.4226	95.9034		76.7449	94.3678		82.7615	*80.554		71.1052	96.9275		112.181	171.397		93.9296	128.746		53.1861	100.469		65.2572	110.195
90.807	150.768		104.443	143.346					104.091	141.071		72.5597	116.464		118.397	109.389						92.4246
135.486	148.542		117.016	144.572					110.027	125.96					100.836	145.883
									100	155.654					80.7668	71.8077
							*outlier

## Sheet: Fig1S1A
p-PKCι			p-cPKC			p-PKCε
NTC	ζ-cKO		NTC	ζ-cKO		NTC	ζ-cKO
98.6062	266.85		140.378	240.731		92.5868	58.1325
101.394	157.448		59.6221	293.854		107.413	216.248
58.9202	151.263		103.69	170.907		54.1985	141.636
147.612	184.039		96.3104	282.349		135.897	177.111
93.8557			73.5617	129.849		91.3552	135.349
99.6117			115.695	178.107		118.549	99.5309
			85.2142	147.21		100.999	91.2472
			125.529	84.0232		81.3066	100.917
			80.7124	135.306		117.695	*408.397
			132.882	153.003
			86.406	86.3599
				*476.036
							*outlier

## Sheet: Fig1S1B
CaMKIIα			p-CaMKIIα
NTC	ζ-cKO		NTC	ζ-cKO
100.307	92.7878		105.805	119.675
91.035	119.309		93.9763	131.623
95.9603	98.1236		94.3924	120.493
112.698	83.7174		105.827	76.0488
104.837	83.0661		115.022	78.1257
94.5504	102.322		93.2309	100.847
100.612	97.963		91.7467	91.1649

## Sheet: Fig2B
PKMζ			PKMζ			PKMζ
p	p		r	r		lm	lm
Vehicle	OH-TAM		Vehicle	OH-TAM		Vehicle	OH-TAM
65.7594	15.0704		105.791	27.249		39.4825	93.5776
85.6426	15.09		98.3742	24.3832		116.735	49.5263
96.2444	18.1039		89.6252	31.8406		108.35	72.8105
104.354	16.4172		96.2786	25.5105		67.4969	35.621
147.999	5.78944		109.931	8.7805		167.935	19.3459
PKCι			PKCι			PKCι
p	p		r	r		lm	lm
Vehicle	OH-TAM		Vehicle	OH-TAM		Vehicle	OH-TAM
106.521	180.679		38.9651	491.649		54.905	189.246
97.4641	164.777		85.1007	396.044		259.386	281.591
72.9306	291.763		43.5797	449.517		60.5393	173.715
90.54	254.305		90.9144	348.536		48.6889	300.932
132.544	284.753		241.44	370.382		76.4809	188.078

## Sheet: Fig2C
Vehicle				OH-TAM
Pretraining	Training	Retention		Pretraining	Training	Retention
0.17	700.2	508.1		0.17	569	413.4
5.53	802.53	599.23		17.2	739.6	828.57
8.53	284.37	267.63		6.2	326.7	371.13
3.5	587.1	269.43		4	502.9	299.93

## Sheet: Fig3B
AAV-eGFP (ζ-KO)			AAV-Cre (ι/ζ-dKO)
Control	LTP (3 h)		Control	LTP (3 h)
122.435	217.956		23.6574	8.58538
77.5652	174.916		4.61769	32.8
95.9859	256.808		35.5148	29.0228
104.014	183.896		8.47449	18.3772
			29.066	*174.998
				*outlier

## Sheet: Fig4A
	AAV-eGFP (ζ-KO)							AAV-eGFP (ζ-KO)							AAV-Cre (ι/ζ-dKO)							AAV-Cre (ι/ζ-dKO)
Time (5 min average)	Untetanized 1	Untetanized 2	Untetanized 3	Untetanized 4	Untetanized 5	Untetanized 6		Tetanized 1	Tetanized 2	Tetanized 3	Tetanized 4	Tetanized 5	Tetanized 6		Untetanized 1	Untetanized 2	Untetanized 3	Untetanized 4	Untetanized 5	Untetanized 6		Tetanized 1	Tetanized 2	Tetanized 3	Tetanized 4	Tetanized 5	Tetanized 6
-30	1.07309	1.0385	--	0.97641	1.02969	1.01375		1.02478	0.97224	1.07627	0.95126	0.99936	1.05593		0.95069	0.98842	1.02763	0.98391	1.01781	1.01949		0.99199	1.02386	1.03177	0.9788	1.08398	1.02596
-25	1.06097	1.02386	1.01298	1.01497	0.98768	1.02135		1.00207	1.0037	1.07071	0.99134	0.99115	0.99197		0.96564	1.00163	1.03988	0.9672	0.99851	1.02352		0.94104	1.03552	1.14491	0.99576	1.017	1.03743
-20	1.02293	0.98101	1.00186	1.0238	0.98141	1.01375		0.98447	0.93634	0.98911	0.96658	0.99488	0.99328		0.97867	0.99811	0.92581	0.99196	1.00816	1.0195		1.05812	1.03234	0.9342	0.99576	1.01391	1.0097
-15	0.96441	1.02003	0.97297	0.99613	1.0297	1.00868		0.9822	1.07475	0.99466	1.05499	1.04418	1.01286		0.99939	1.00075	0.9746	0.99257	1.00414	0.97819		1.02726	0.99417	0.90306	1.02779	1.01288	0.99154
-10	0.94727	0.99286	1.00075	0.98877	1.01213	0.9656		0.9822	1.01406	0.9545	1.03141	1.03447	0.97109		1.03741	1.00691	1.07477	1.04332	0.98324	0.97719		0.99836	0.96271	1.06395	1.03062	0.95724	0.95425
-5	0.93138	0.94374	1.01742	0.99996	0.95946	0.977		1.02421	0.99888	0.91476	1.0043	0.93588	0.97501		1.06817	1.00427	0.9522	1.02104	0.98806	0.98222		0.98317	0.9514	0.89579	0.97127	0.91499	0.98102
0	--	--	--	--	--	--		--	--	--	--	--	--		--	--	--	--	--	--		--	--	--	--	--	--
5	1.02502	0.94827	0.99408	1.05	0.99144	0.98587		2.56281	3.12656	3.6928	2.62038	2.27807	2.4225		1.05322	1.04916	0.89941	0.9703	1.0363	1.19881		2.37735	1.72469	2.19329	2.26472	1.94539	1.89224
10	1.00704	0.94827	0.99741	1.06913	1.01339	0.95292		1.94453	2.39229	2.73019	2.55555	1.82321	1.89388		1.06048	1.0298	0.78879	0.98577	1.02102	0.98827		1.69496	1.57979	1.62966	1.75601	1.44874	1.25639
15	1.01707	0.93329	0.99019	1.05383	0.99897	0.98207		1.91047	2.282	2.46742	2.5249	1.78138	1.68896		1.04788	1.03508	0.91544	0.92327	1.00414	1.07288		1.57641	1.54162	1.68364	1.65709	1.34776	1.19424
20	1.02575	0.91552	0.95852	1.03057	0.95946	0.94659		1.8605	2.20317	2.27302	2.44592	1.7881	1.65633		1.04403	1.06148	0.79312	0.80631	1.00816	1.08598		1.49411	1.53737	1.58295	1.59962	1.23544	1.14739
25	0.96942	0.88033	0.94796	0.93873	0.96259	0.96179		1.7725	2.05772	1.87193	2.24318	1.73432	1.62762		1.07799	1.02451	0.75265	0.80507	0.98163	1.1424		1.38242	1.5448	1.76149	1.34244	1.20453	1.06229
30	0.95981	0.92911	0.97352	0.9614	0.89612	0.94786		1.74241	2.02738	1.83465	2.21842	1.71565	1.58977		1.09188	0.99371	0.89564	0.89604	1.0178	1.14844		1.32461	1.49815	1.64731	1.47904	1.18599	1.0317
35	0.93891	0.93886	0.9863	0.95374	0.96886	0.94279		1.68734	1.9763	1.75133	2.06754	1.69996	1.58455		1.11622	0.98314	0.76719	0.93131	0.98967	1.19881		1.29081	1.50663	1.54039	1.45172	1.10252	0.95616
40	0.92009	0.91273	1.02742	0.94226	0.98329	0.99474		1.66406	1.90414	1.71203	2.0923	1.61183	1.6224		1.11986	1.00603	0.72594	0.94616	0.97681	1.13635		1.23791	1.4932	1.27934	1.38577	1.07264	0.88923
45	0.92344	0.85316	0.99408	0.93372	0.94942	0.96306		1.60388	1.82382	1.68468	2.21017	1.69026	1.56105		1.11751	0.96642	0.82847	0.92884	0.94465	1.07289		1.18255	1.4674	1.38262	1.36882	1.04997	0.9007
50	0.8808	0.8556	0.99241	0.92018	0.90741	0.94279		1.62375	1.73907	1.55138	1.99564	1.62901	1.61457		1.13331	1.00515	0.89281	0.90842	1.00173	1.06886		1.18353	1.45432	1.48953	1.34056	1.01906	0.84333
55	0.91675	0.84445	0.97852	0.92754	0.92058	0.99601		1.62773	1.68023	1.58257	2.00271	1.67308	1.5741		1.16984	1.00603	0.92769	0.90965	1.02183	1.06684		1.11495	1.41226	1.52794	1.21997	1.051	0.82325
60	0.89543	0.8448	0.97741	0.91842	0.98768	0.98334		1.60672	1.67949	1.5219	2.01804	1.67532	1.58977		1.15617	1.01307	0.87018	0.95359	0.95832	1.13938		1.11985	1.41721	1.76071	1.28686	0.96445	0.89497
65	0.87829	0.83609	0.96074	0.92342	1.07296	0.977		1.51304	1.61065	1.46251	1.92373	1.66486	1.60282		1.17688	0.96642	0.87207	0.92822	0.91651	1.10915		1.18304	1.36066	1.72308	1.20207	0.93766	0.86915
70	0.87996	0.77896	0.96408	0.90223	1.01715	0.97447		1.48863	1.52997	1.4561	2.05929	1.66038	1.56497		1.18799	1.02275	0.72877	0.92203	0.9149	1.12325		1.13699	1.36773	1.68467	1.21338	0.81504	0.89305
75	0.85864	0.89496	0.97241	0.89781	1.00586	0.92758		1.52326	1.50999	1.47234	2.01332	1.59092	1.57149		1.18778	0.9673	0.93807	0.88552	0.96234	1.16557		1.10319	1.38541	1.62136	1.16816	0.80474	0.80891
80	0.89083	0.86536	0.9563	0.89369	0.99646	0.92378		1.46706	1.4826	1.38859	2.08169	1.5842	1.57149		1.20401	1.01571	0.89847	0.87438	0.94545	1.1293		1.1561	1.39565	1.78744	1.122	0.81195	0.82995
85	0.86658	0.8556	0.97797	0.90811	1.00273	0.94025		1.44435	1.44596	1.36424	1.83179	1.62527	1.54409		1.23947	1.00339	0.70803	0.86695	0.91169	1.12427		1.12132	1.40484	1.7428	1.14555	0.76146	0.80509
90	0.86784	0.84097	0.96908	0.89251	0.98893	0.93518		1.4188	1.42931	1.34885	1.9921	1.58644	1.53886		1.25121	0.99107	0.78816	0.85211	0.96877	1.08296		1.09046	1.37021	1.63589	1.14084	0.75631	0.76971
95	0.88247	0.857	0.98742	0.89251	0.96824	0.93392		1.44605	1.37601	1.33048	2.02039	1.62901	1.57932		1.27086	0.9673	0.832	0.85829	0.93822	1.13434		1.06792	1.32426	1.5269	1.12011	0.7965	0.74294
100	0.87494	0.83888	0.98853	0.88957	0.95068	0.93012		1.4188	1.37786	1.30571	1.98739	1.65665	1.56236		1.29287	0.9673	0.86382	0.81993	0.94465	1.14341		1.02432	1.26171	1.72827	1.10127	0.7965	0.71616
105	0.89083	0.7901	0.97519	0.87868	0.96071	0.96813		1.41937	1.31901	1.26084	2.15006	1.66934	1.56497		1.29287	1.00603	0.92581	0.83539	0.95912	1.13131		1.05421	1.2041	1.46566	1.08903	0.7594	0.73337
110	0.88414	0.8023	0.97797	0.87338	0.94817	0.97446		1.40517	1.28497	1.35911	2.07697	1.62005	1.57019		1.27086	0.95498	1.0512	0.80631	0.93741	1.11923		1.04931	1.21859	1.64938	1.04757	0.76146	0.68174
115	0.90713	0.80996	1.01131	0.86514	0.90427	0.9656		1.44037	1.29459	1.41936	2.12412	1.56851	1.55583		1.2698	0.98315	1.07359	0.81745	0.95108	1.0749		1.01061	1.18289	1.84556	1.09468	0.72746	0.69417
120	0.88163	0.8117	1.01853	0.86366	0.90741	0.94405		1.41369	1.25758	1.34971	2.1418	1.55805	1.53364		1.24673	0.98403	0.98049	0.81498	0.976	1.05979		1.03069	1.13978	1.84972	1.05605	0.76352	0.70373
125	0.8971	0.79951	0.99186	0.86219	0.92936	0.98714		1.44605	1.24759	1.35228	2.00153	1.57747	1.54409		1.23883	0.96114	1.0908	0.80693	0.94545	1.08095		0.97876	1.13801	1.92808	0.98822	0.74086	0.69608
130	0.9155	0.79429	1.00075	0.82746	0.91242	0.97447		1.45968	1.21428	1.29673	2.10644	1.60361	1.54408		1.22729	0.96378	1.33403	0.77104	0.93581	1.08095		1.02481	1.11256	1.63485	0.97127	0.70067	0.64254
135	0.92553	0.80369	0.96241	0.83099	0.92309	0.91618		1.39211	1.1732	1.25401	2.031	1.60661	1.50884		1.23071	0.95586	1.28972	0.78589	1.00414	1.0618		1.01943	1.1161	1.84141	0.99011	0.72952	0.57369
140	0.93305	0.80265	0.96296	0.82952	0.86414	0.92124		1.37849	1.20059	1.2476	1.9756	1.63798	1.54931		1.21255	0.9409	0.91921	0.80508	0.92535	1.05979		1.02971	1.06273	1.79574	0.9854	0.78413	0.59091
145	0.9364	0.80648	0.97686	0.80921	0.82463	0.91998		1.40858	1.16469	1.21641	2.0086	1.59092	1.44619		1.22302	0.93034	1.02292	0.79579	0.94063	1.04367		0.99199	1.03516	1.62758	0.91097	0.78413	0.63202
150	0.93723	0.80335	0.96463	0.79802	0.82526	0.90224		1.43583	1.1806	1.09763	1.98975	1.52444	1.48796		1.20551	0.94794	1.02574	0.77166	0.93098	1.09203		1.06008	1.02032	1.64834	0.93453	0.7491	0.54405
155	0.94936	0.79185	0.96741	0.82716	0.77133	0.91744		1.40915	1.15358	1.22281	1.98857	1.44975	1.47491		1.21234	0.94706	1.08985	0.75309	0.96073	1.12225		1.05763	0.97261	1.51237	0.91192	0.72437	0.57178
160	0.95897	0.78976	0.97964	0.7989	0.78199	0.91364		1.37622	1.10362	1.22324	2.00389	1.46544	1.48927		1.21875	0.93562	1.04083	0.78032	0.96877	1.09706		1.06645	0.96908	1.64315	0.88083	0.76867	0.53067
165	0.96148	0.82494	0.96408	0.79007	0.76882	0.92251		1.39268	1.10881	1.31126	1.89191	1.60511	1.47491		1.21875	0.93826	0.88386	0.76175	0.95188	1.07087		1.04588	0.94398	1.25598	0.90626	0.74292	0.58613
170	0.97653	0.83957	0.96574	0.72943	0.9187	0.91744		1.38303	1.08993	1.06986	1.90016	1.71714	1.4971		1.23306	0.90129	0.9581	0.75062	0.94224	1.07389		1.09046	0.94964	1.34421	0.91098	0.77074	0.56031
175	0.97987	0.83957	0.95574	0.75505	0.84533	0.95039		1.43015	1.10362	1.20786	1.92491	1.70445	1.49579		1.22302	0.91273	1.0017	0.75062	0.94787	1.05374		1.02775	0.94328	1.27051	0.90438	0.7017	0.54788
180	0.99952	0.83539	0.93537	0.81451	0.85724	0.93772		1.41539	1.09289	1.29545	1.8259	1.64918	1.4736		1.24181	0.94178	0.73348	0.78094	1.02638	1.10512		1.1076	0.95777	1.08679	0.89684	0.75837	0.45705

## Sheet: Fig4A-inset
	AAV-eGFP (ζ-KO)					AAV-eGFP (ζ-KO)						AAV-Cre (ι/ζ-dKO)					AAV-Cre (ι/ζ-dKO)
Time (5 min average)	Untetanized 1	Untetanized 2	Untetanized 3	Untetanized 4		Tetanized 1	Tetanized 2	Tetanized 3	Tetanized 4	Tetanized 5		Untetanized 1	Untetanized 2	Untetanized 3	Untetanized 4		Tetanized 1	Tetanized 2	Tetanized 3	Tetanized 4	Tetanized 5
-30	0.90733	1.01028	1.05007	1.05039		0.85079	0.96683	0.9537	0.90543	0.95777		0.95033	0.97719	0.92739	0.96481		0.95297	1.09545	1.03774	1.00168	0.91952
-25	0.95834	0.94704	0.98868	1.04709		0.99388	0.98668	1.01261	0.97968	1.05997		0.94974	1.0307	0.96666	0.9642		0.96439	1.06585	1	0.94181	1.00434
-20	0.99842	0.99605	0.98868	1.01084		1.02797	1.00745	0.98315	1.00031	0.98311		1.01569	1.0193	1.00593	1.01348		1.04088	0.93721	0.99829	1.00543	0.91952
-15	1.06402	0.98972	1.04354	0.94741		1.05225	1.00474	1.05128	1.09518	1.08277		1.02349	0.97895	1.01932	1.02565		1.02505	0.94334	0.98799	1.05782	1.0431
-10	1.03486	1.02609	1.00044	0.93175		1.04605	1.02279	0.98315	1.0065	0.98142		1.02828	0.9807	1.05324	1.04207		1.02681	0.99132	0.99657	0.98671	1.0588
-5	1.03705	1.03083	0.92861	1.01249		1.029	1.01151	1.0163	1.01268	0.93497		1.03248	1.01316	1.02736	0.98976		0.98989	0.96682	0.97942	1.00668	1.05462
0	--	--	--	--		--	--	--	--	--		--	--	--	--		--	--	--	--	--
5	1.12742	1.01502	0.98738	1.01826		1.84518	3.16588	1.58888	1.91193	2.35135		1.03967	1.0807	0.99076	0.98367		2.10549	1.80092	3.1681	1.82125	2.17102
10	1.13908	0.99605	1.02786	0.97789		1.6556	2.13812	1.5944	1.75725	1.88513		1.05466	1.06842	1.00594	0.94231		1.42945	1.37009	2.42367	1.47446	1.38975
15	1.19228	0.9913	1.02395	0.84278		1.68195	2.05462	1.6478	1.74487	1.71875		1.05766	1.09912	1.04253	0.90094		1.31692	1.17611	2.23499	1.44327	1.38032
20	1.19228	1.00395	0.97562	1.12124		1.64372	1.99052	1.67173	1.77375	1.81588		1.06725	1.15439	1.11572	0.89242		1.35033	1.20776	2.22299	1.41209	1.41907
25	1.23747	1.01028	0.97562	1.10064		1.64476	1.90386	1.64964	1.72012	1.78716		1.09184	1.08947	1.09519	0.92101		1.28703	1.09444	2.07033	1.34348	1.47562
30	1.30233	1.04032	0.94428	1.09734		1.68608	1.87001	1.62386	1.7758	1.83108		1.10983	1.09101	1.17374	0.91858		1.30286	1.12506	2.02402	1.39088	1.45782
35	1.28046	1.03083	0.92077	1.0751		1.64992	1.79147	1.66252	1.85006	1.76436		1.10383	1.12018	1.1184	0.88999		1.30286	1.03522	1.98456	1.41084	1.34576
40	1.36646	1.0166	0.90901	0.97377		1.66232	1.78019	1.59809	1.85624	1.69595		1.10203	1.1114	1.11483	0.89911		1.27297	0.98826	2.03431	1.42082	1.53113
45	1.38686	1.07668	0.83457	0.94494		1.66593	1.76755	1.59256	1.85624	1.73564		1.11042	1.08509	1.12465	0.91493		1.24835	0.97805	1.91938	1.36344	1.51437
50	1.38687	1.08775	0.86069	0.9367		1.68195	1.7522	1.63123	1.87274	1.70503		1.11222	1.13377	1.13982	0.95812		1.24923	0.93619	1.9554	1.29857	1.32377
55	1.36864	1.07668	0.80192	0.91446		1.71398	1.59603	1.62386	1.81087	1.58868		1.12062	1.16491	1.10769	0.93683		1.2422	0.86881	1.83362	1.28111	1.42745
60	1.36864	1.02767	0.82412	0.93835		1.66232	1.64477	1.70671	1.98206	1.58277		1.1422	1.0329	1.14875	0.92406		1.25627	0.86575	1.82161	1.24493	1.3688
65	1.37156	1.02292	0.86461	0.87079		1.66903	1.69352	1.68462	1.93255	1.60304		1.12062	1.12982	1.18535	0.90641		1.26242	0.77795	1.78902	1.19753	1.38242
70	1.37812	1.06877	0.85285	0.83454		1.64475	1.52968	1.66436	1.86243	1.56841		1.13081	1.17631	1.05592	0.89121		1.26154	0.71363	1.81647	1.17632	1.30596
75	1.39051	1.12095	0.81498	0.84608		1.64321	1.587	1.66252	1.87274	1.54138		1.16079	1.21579	1.14964	0.9052		1.25978	0.67177	1.73756	1.20252	1.21694
80	1.37666	1.12253	0.85677	0.86173		1.62926	1.56714	1.68094	1.97381	1.54139		1.1422	1.15965	1.19695	0.88938		1.29143	0.6636	1.67581	1.13765	1.43792
85	1.35698	1.13043	0.84371	0.85349		1.61635	1.54277	1.63859	2.01506	1.51689		1.1464	1.15439	1.23711	0.88208		1.21583	0.62889	1.66038	1.26863	1.61491
90	1.39415	1.12095	0.86591	0.88974		1.65147	1.48454	1.68462	1.98206	1.49324		1.15479	1.18596	1.17999	0.92649		1.18593	0.58908	1.69297	1.18381	1.47248
95	1.34313	1.09881	0.88159	0.8848		1.61583	1.47461	1.6883	2.03568	1.52661		1.1554	1.23509	1.17463	0.89181		1.18154	0.62685	1.77702	1.24992	1.34053
100	1.31617	1.13992	0.81759	0.82301		1.59981	1.48499	1.70487	2.12437	1.42736		1.15779	1.19123	1.20676	0.90459		1.19385	0.58805	1.64151	1.15636	1.33005
105	1.35115	1.11462	0.77188	0.81724		1.57812	1.45836	1.71223	2.09756	1.49071		1.17518	1.17895	1.25675	0.90824		1.15516	0.5952	1.59691	1.21749	1.4285
110	1.34387	1.10672	0.75229	0.79829		1.58173	1.43399	1.70303	2.05425	1.47699		1.16619	1.20351	1.21212	0.93227		1.1244	0.56457	1.67581	1.12268	1.34681
115	1.32419	1.12569	0.74445	0.79829		1.58948	1.38434	1.66989	2.12437	1.32939		1.17518	1.22632	1.19962	0.90459		1.14374	0.59418	1.48885	1.1888	1.36566
120	1.3118	1.12727	0.76926	0.76452		1.58019	1.4719	1.67357	2.1553	1.4451		1.16319	1.24649	1.22462	0.949		1.0989	0.54926	1.6518	1.27487	1.19286
125	1.27536	1.10039	0.76535	0.7917		1.55384	1.71745	1.72328	2.07281	1.41787		1.18597	1.24386	1.24782	0.9277		1.08308	0.53395	1.51972	1.24119	1.41069
130	1.25131	1.13201	0.74576	0.80983		1.59206	1.71203	1.67357	1.95731	1.39569		1.17458	1.28246	1.26836	0.9417		1.03209	0.51455	1.47856	1.12892	1.24732
135	1.30087	1.10672	0.73792	0.77193		1.54093	1.41954	1.71408	1.81706	1.48015		1.18417	1.27368	1.26568	0.91858		1.07077	0.47371	1.47684	1.19878	1.37823
140	1.34095	1.12095	0.7327	0.77193		1.54712	1.42947	1.657	2.0068	1.39464		1.1488	1.26404	1.30495	0.90641		1.03121	0.50842	1.3825	1.32976	1.16563
145	1.26516	1.11778	0.67915	0.76369		1.58483	1.43354	1.72512	2.14912	1.35135		1.1524	1.22983	1.29602	0.94656		1.01363	0.49413	1.42367	1.26364	1.45049
150	1.25058	1.15731	0.71833	0.79582		1.5962	1.43263	1.66805	2.11818	1.22382		1.16319	1.29737	1.2862	0.90276		0.99341	0.50944	1.43568	1.23371	1.4662
155	1.23965	1.1415	0.6896	0.77523		1.59206	1.41232	1.61834	2.17593	1.34882		1.11402	1.2772	1.25139	0.93683		0.99868	0.50536	1.38765	1.26115	1.2138
160	1.20029	1.12095	0.70658	0.73733		1.56675	1.3893	1.68462	2.04393	1.53801		1.11042	1.29298	1.32012	0.9198		1.05143	0.47984	1.36707	1.28111	1.26931
165	1.18499	1.14309	0.71572	0.70685		1.57089	1.43354	1.65516	2.08518	1.43581		1.10263	1.33421	1.29959	0.94048		1.02769	0.55743	1.30875	1.31354	1.44106
170	1.18135	1.15099	0.69352	0.69284		1.54919	1.41955	1.66253	2.00268	1.39781		1.11582	1.32894	1.31566	0.97029		1.03824	0.58397	1.39623	1.31354	1.12478
175	1.1675	1.13043	0.73792	0.73321		1.55797	1.42361	1.71592	1.87274	1.35726		1.08944	1.25526	1.35761	0.96968		1.04176	0.62378	1.37907	1.25491	1.29968
180	1.13471	1.11462	0.6896	0.72662		1.53266	1.41729	1.67173	1.92843	1.21031		1.07625	1.32807	1.35226	0.97272		1.04528	0.59826	1.36364	1.31604	1.31015

## Sheet: Fig4B
	Control					AAV-Cre (ι/ζ-dKO)
Time (5 min average)	Tetanized 1	Tetanized 2	Tetanized 3	Tetanized 4		Tetanized 1	Tetanized 2	Tetanized 3	Tetanized 4	Tetanized 5
-90	1.05312	1.21632	0.996682	0.692544		0.8685	1.28285	1.24901	1.13253	--
-85	1.05781	1.17986	0.982258	0.871168		0.902078	1.20622	1.23314	1.13254	--
-80	1.05938	1.12013	0.998844	0.965176		0.923708	1.20538	1.18554	1.08257	--
-75	1.03281	1.15659	0.998122	0.992598		0.963548	1.07127	1.10507	1.05054	--
-70	1.00312	0.953354	0.997402	1.02315		0.969238	1.08793	1.05293	1.08385	--
-65	1.04219	1.05652	0.986586	1.0114		0.98859	1.00879	1.03706	1.01979	--
-60	1.0375	1.11858	0.978654	1.00905		0.986882	1.02045	1.02346	1.00442	--
-55	1.02344	1.13875	1.00894	1.03647		1.02444	1.06793	1.0654	0.999296	--
-50	1.025	1.00223	1.0111	0.998082		1.06941	1.02712	1.00873	1.0262	--
-45	0.995312	1.05632	1.00173	1.01296		1.09957	1.00962	0.987192	0.97111	--
-40	0.973438	1.11548	0.997406	1.0161		1.11266	0.985462	0.93959	1.01083	--
-35	0.989064	1.04644	0.978652	0.997298		1.12916	0.956306	0.864786	1.00442	0.65705
-30	0.981252	1.09764	0.985146	1.03412		1.10811	0.952974	0.848918	0.964706	1.01357
-25	0.9875	0.745464	0.997402	1.03568		1.00282	0.90966	0.870452	0.969828	1.09144
-20	0.965626	0.830014	1.01183	1.01767		0.98745	0.843016	0.93279	0.950612	1.03425
-15	0.95625	0.965766	0.991632	1.0396		0.963546	0.868008	0.890854	0.899366	1.16079
-10	0.95	1.0348	1.03058	1.08034		0.961838	0.870506	0.930522	0.95061	1.08536
-5	0.95469	1.04722	1.02769	1.12186		0.958994	0.81053	0.844386	0.881428	1.09387
0	--	--	--	--		--	--	--	--	--
5	1.93594	1.93463	1.99336	2.79603		1.5435	1.17622	3.09759	1.67702	2.00402
10	2.15625	2.24725	2.21982	3.00364		1.72334	1.19538	2.94684	1.66293	2.03565
15	1.96563	2.26276	2.07847	2.69341		1.57195	1.14207	2.6975	1.52585	1.81177
20	1.88438	2.28681	1.93927	2.53829		1.48203	1.06877	2.58415	1.53353	1.62682
25	1.82188	2.14408	1.90754	2.48423		1.43138	1.09126	2.49462	1.46051	1.75336
30	1.75156	2.08822	1.85778	2.42156		1.36763	1.05794	2.42434	1.42592	1.54286
35	1.70938	2.06806	1.87365	2.37926		1.3221	1.02712	2.34161	1.42079	1.58301
40	1.675	2.07426	1.85994	2.30483		1.28169	1.05794	2.41188	1.39261	1.6621
45	1.63125	2.16114	1.87653	2.30483		1.23844	1.01129	2.38468	1.37467	1.6913
50	1.64063	2.09366	1.84624	2.27584		1.2134	0.963804	2.30761	1.3657	1.49054
55	1.63906	2.11305	1.80009	2.13404		1.18551	0.963804	2.2668	1.40542	1.51001
60	1.63281	2.16347	1.77052	2.20298		1.14965	0.927154	2.24413	1.35033	1.48932
65	1.60469	2.1658	1.79432	2.2022		1.1229	0.972134	2.24527	1.31446	1.24232
70	1.625	2.15106	1.78494	2.13326		1.08762	0.95714	2.21127	1.2914	1.20825
75	1.58281	2.14718	1.86139	2.16225		1.06713	0.941312	2.209	1.28115	1.21555
80	1.67344	2.172	1.80946	2.16695		1.05689	0.91549	2.1852	1.28884	0.986798
85	1.60313	2.18597	1.85129	2.05962		1.05006	0.805532	2.1512	1.34777	0.977062
90	1.52656	2.33723	1.83182	2.004		1.029	0.73139	2.12286	1.34905	1.21068
95	1.58281	2.33568	1.80658	2.00635		1.01363	0.7139	2.1784	1.36955	1.29738
100	1.55782	2.37214	1.87148	2.13013		1.01818	0.715564	2.1784	1.34777	1.48293
105	1.6125	2.20536	1.8549	2.18967		0.999404	0.703902	2.17046	1.27858	1.19973
110	1.6125	2.16192	1.87293	2.17556		0.983468	0.7114	2.16026	1.34264	1.10117
115	1.63281	2.12701	1.87653	2.13874		0.973792	0.747218	2.15346	1.35418	1.14985
120	1.64375	2.1945	1.88735	2.08939		0.950458	0.795536	2.13646	1.34264	1.10421
125	1.66719	2.21544	1.88374	2.12229		0.933952	0.749718	2.13306	1.33239	1.10361
130	1.65	2.21467	1.87437	2.05727		0.915172	0.788036	2.18407	1.33496	1.03547
135	1.63438	2.21777	1.79432	2.08155		0.913464	0.737224	2.18293	1.30037	1.09509
140	1.58594	2.17666	1.80658	2.0416		0.891836	0.75055	2.10813	1.33752	1.1681
145	1.59688	2.21622	1.79937	2.0087		0.860534	0.753882	2.13646	1.37595	1.17297
150	1.56875	2.25112	1.99264	2.00086		0.878748	0.730558	2.209	1.33752	1.20582
155	1.62188	2.29379	1.98471	2.05335		0.833216	0.760546	2.19313	1.27987	1.19852
160	1.54375	2.28914	1.95658	2.05178		0.840614	0.73889	2.21693	1.28883	1.14863
165	1.60313	2.29844	1.93856	2.00478		0.81614	0.74222	2.1546	1.31958	1.28126
170	1.57031	2.29069	1.98471	1.96953		0.780284	0.738056	2.1954	1.29652	1.01478
175	1.55781	2.36903	2.01572	1.9899		0.775162	0.724728	2.1614	1.3388	1.14133
180	1.5	2.23949	2.00346	1.99538		0.768904	0.728894	2.23053	1.34905	1.00992
185	1.5375	2.21389	2.01212	2.01888		0.762074	0.693906	2.1852	1.28627	1.00505
190	1.50156	2.28836	1.98182	2.02123		0.765486	0.723062	2.26	1.3119	1.23258
195	1.46406	2.28681	1.95442	1.89275		0.735892	0.727226	2.27587	1.31702	1.10482
200	1.47969	2.2775	1.94	1.89118		0.721096	0.676414	2.2294	1.30933	1.22042
205	1.8125	2.23949	2.00346	1.9186		0.781994	0.729726	2.25774	1.36955	1.4516
210	--	2.255	1.94793	1.90215		0.714834	0.678912	2.2056	1.32343	1.05372

[truncated: 4 more sheets: Fig4S1B, Fig5B-Left, Fig5B-Right, Fig5C]
